# Supplementary material for: Use of Germline Genetic Variability for Prediction of Chemoresistance and Prognosis of Breast Cancer Patients
Source: MDPI journal article supplement (doi:10.3390/cancers10120511), 2018-12-12
Supplement: s1 [file s1]

# Supplementary Materials: Use of Germline Genetic Variability for Prediction of Chemoresistance and Prognosis of Breast Cancer Patients

Viktor Hlavac, Maria Kovacova, Katerina Elsnerova, Veronika Brynychova, Renata Kozevnikovova, Karel Raus, Katerina Kopeckova, Sona Mestakova, David Vrana, Jiri Gatek, Pavel Ostasov, Radka Vaclavikova and Pavel Soucek

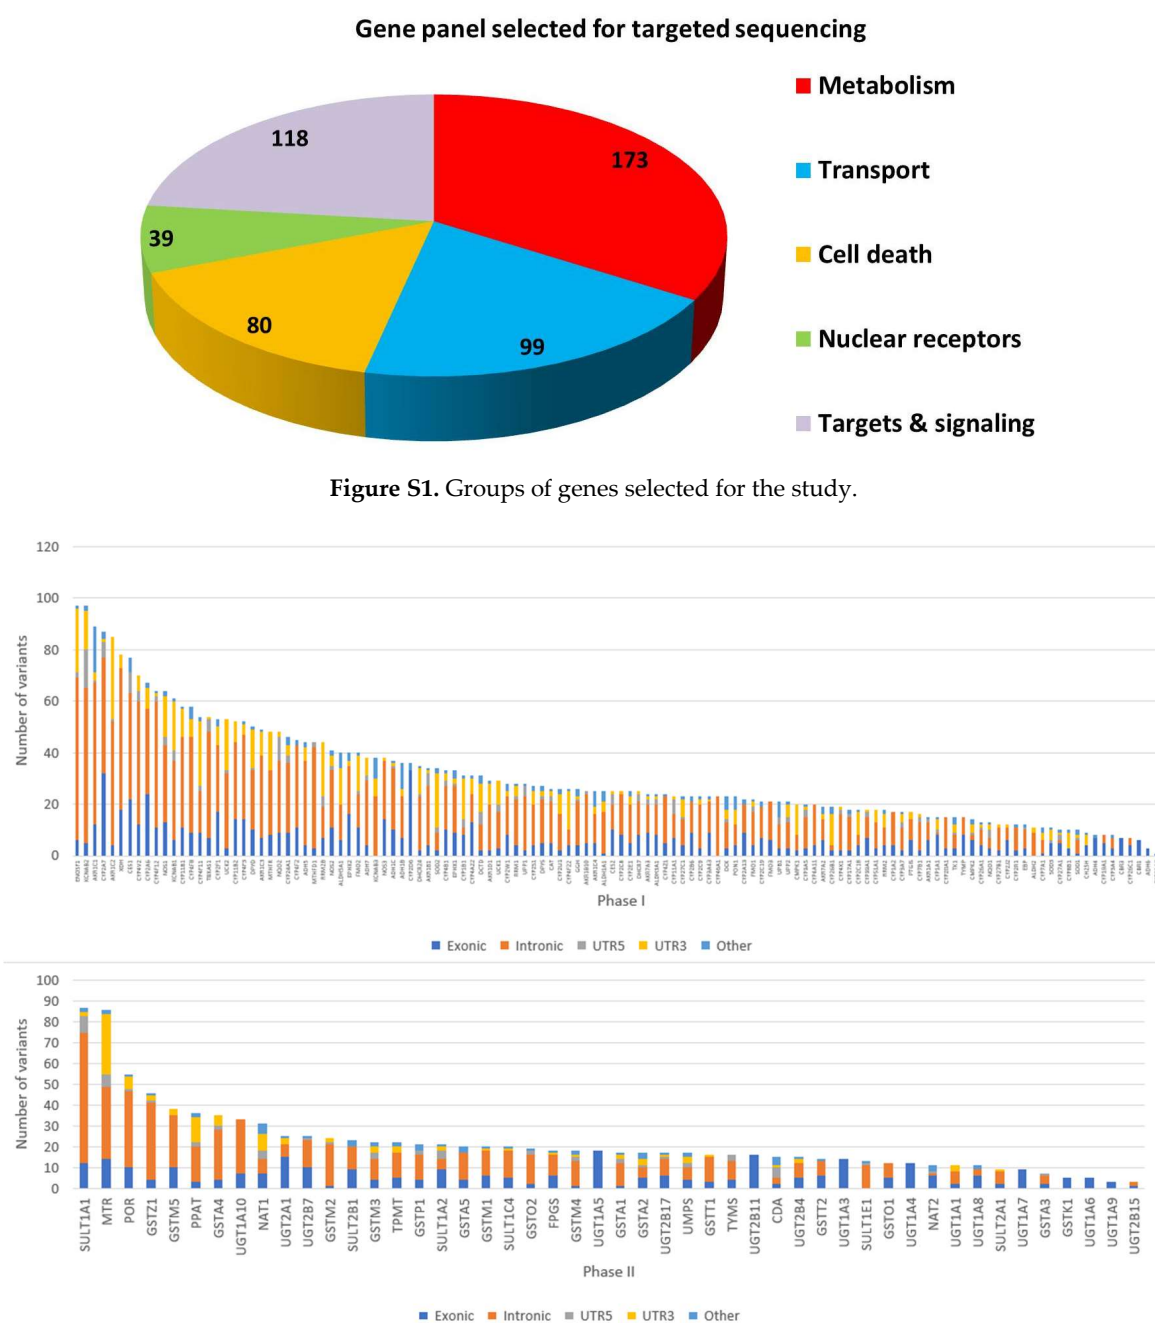

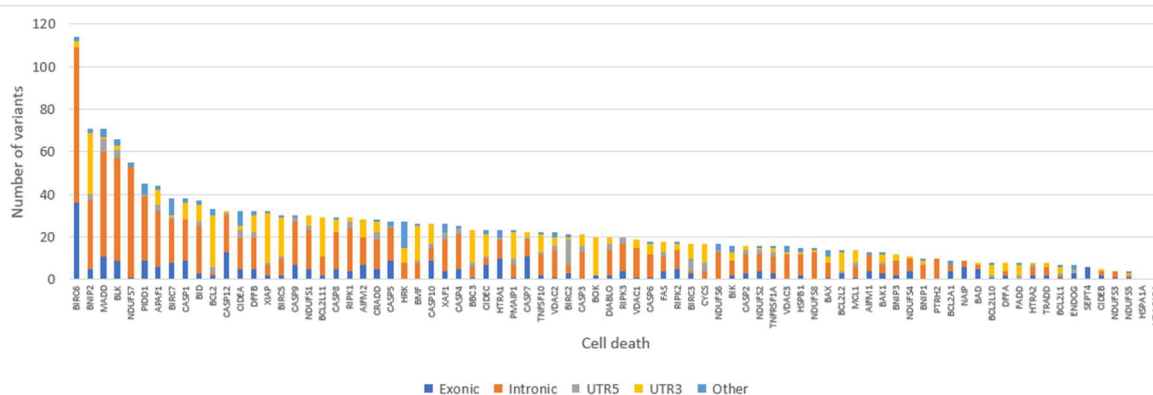

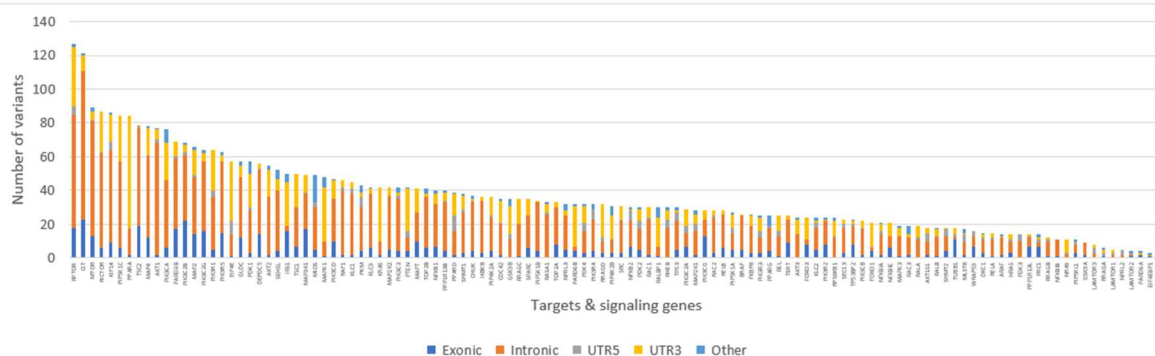

**Figure S2.** Detailed distribution of alterations in the studied groups of genes.

Number of records and definitions of relevant information acquired per each statistically significant variant

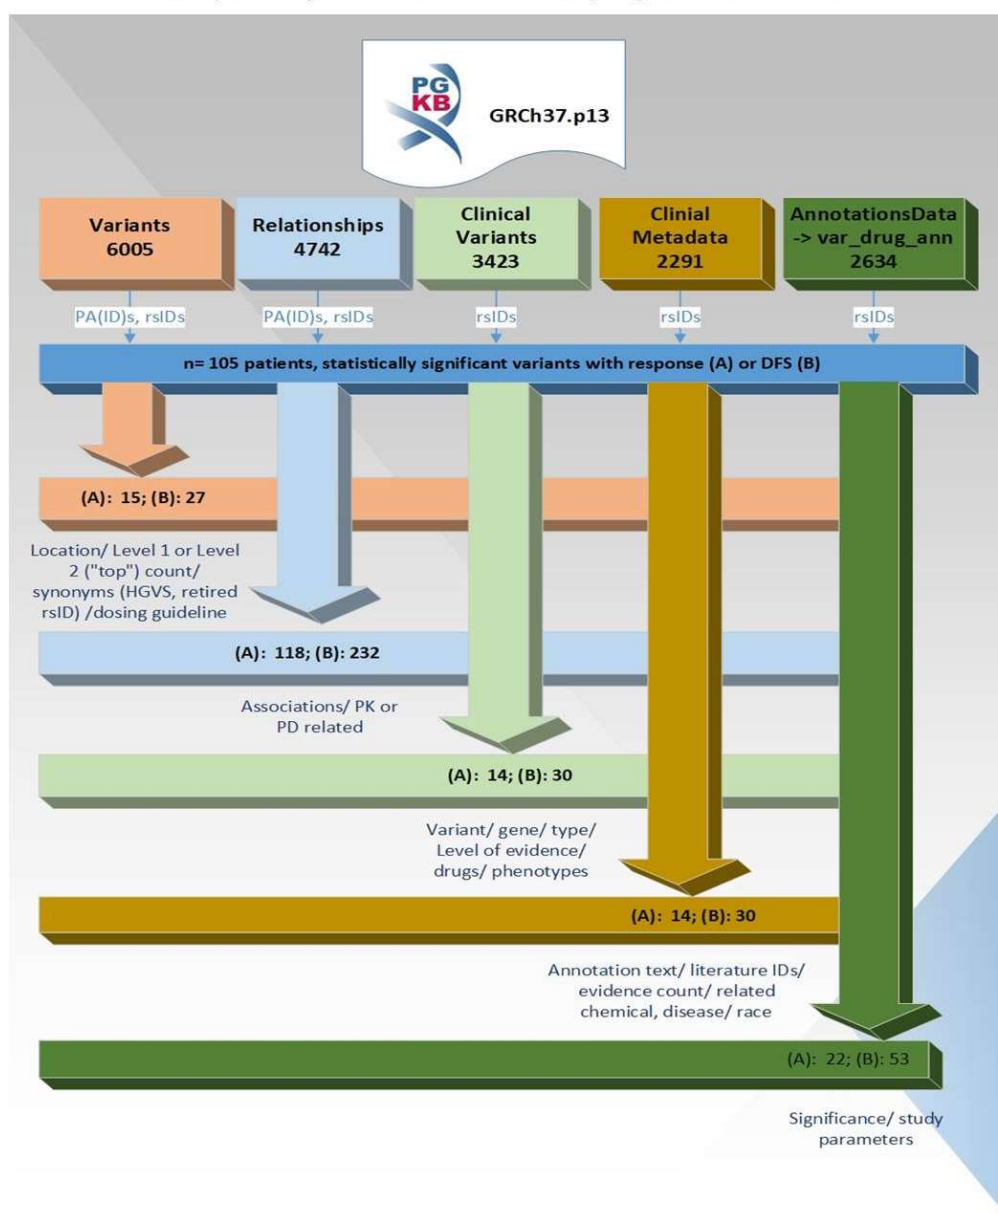

**Figure S3.** Data curation from PharmGKB data files.

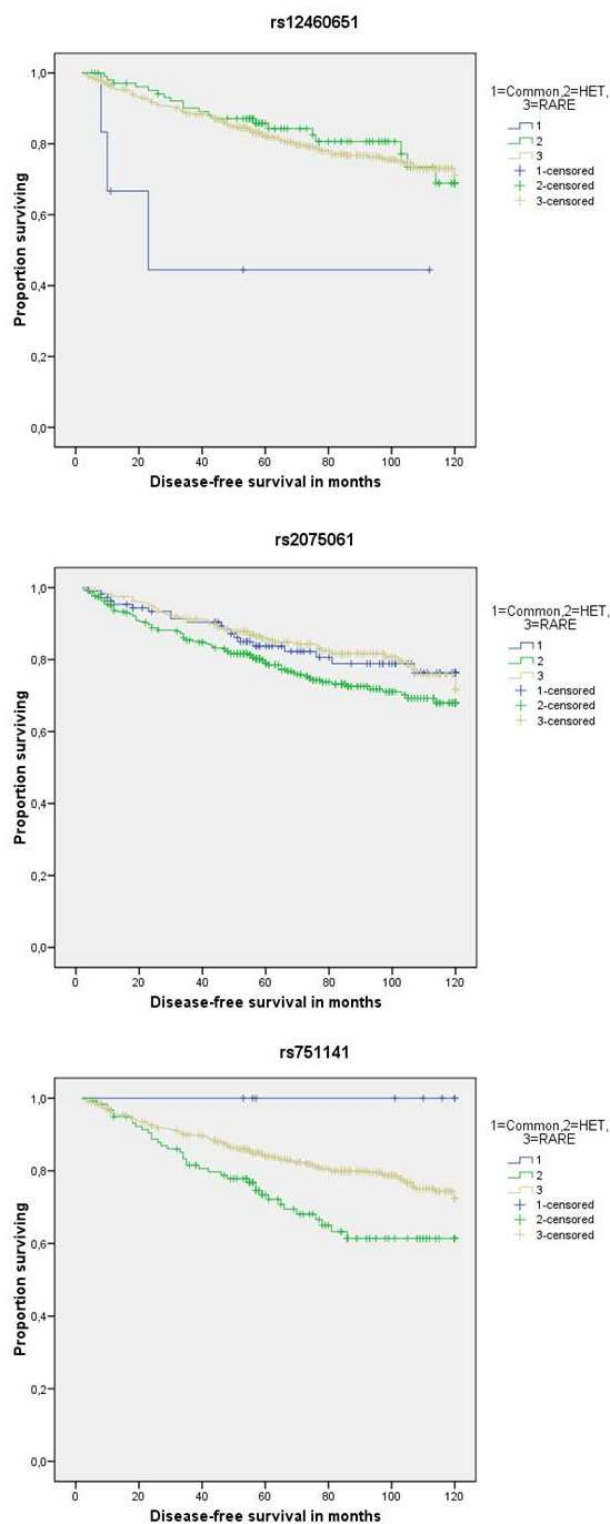

**Figure S4.** Kaplan-Meier plots representing associations of variants with DFS of whole set of patients (rs12460651 and rs751141) or patients treated with hormonal without cytotoxic therapy (rs2075061)

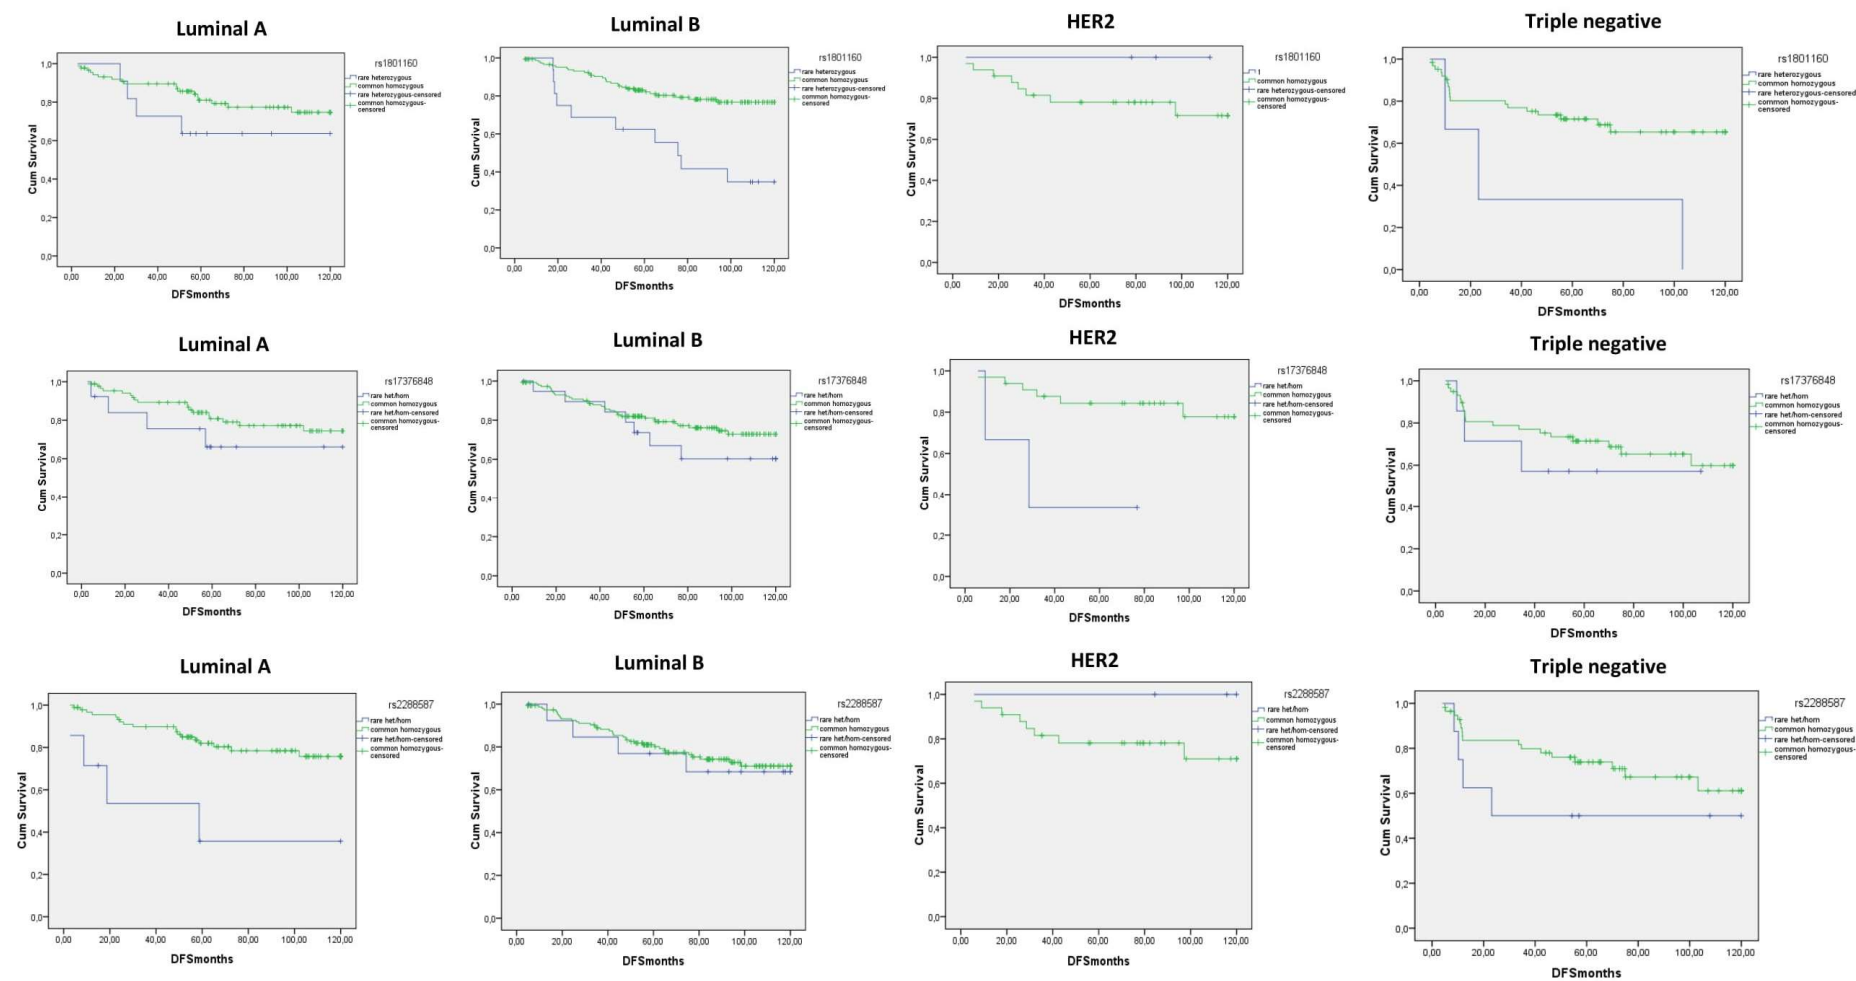

Figure S5. Kaplan-Meier plots representing associations of variants with DFS of patients stratified according to their molecular subtype.

**Table S1.** Treatment regimens in the testing set of patients.**A.** Neoadjuvant cytotoxic therapy ( $n = 68$ ).

| Drugs (regimen)                                                               | <i>N</i> |
|-------------------------------------------------------------------------------|----------|
| anthracycline with cyclophosphamide (and 5-fluorouracil)                      | 22       |
| anthracycline with taxane                                                     | 6        |
| anthracycline with cyclophosphamide (and 5-fluorouracil) followed with taxane | 39       |
| other (1× taxane with vinorelbine)                                            | 1        |

**B.** Adjuvant cytotoxic therapy ( $n = 32$ )<sup>1</sup>.

| Drugs (regimen)                                          | <i>N</i> |
|----------------------------------------------------------|----------|
| anthracycline with cyclophosphamide (and 5-fluorouracil) | 15       |
| anthracycline with cyclophosphamide followed with taxane | 15       |
| taxane monotherapy                                       | 1        |
| other (1× capecitabine with vinorelbine)                 | 1        |

Footnote: <sup>1</sup> In five patients no cytotoxic therapy was used.**Tables S2–S4** are in other separated files.**Table S5.** Treatment regimens in the validation set of patients.**A.** Neoadjuvant therapy ( $n = 180$ )<sup>1</sup>.

| Drugs (regimen)                                                               | <i>N</i> |
|-------------------------------------------------------------------------------|----------|
| anthracycline with cyclophosphamide (and 5-fluorouracil)                      | 55       |
| anthracycline with taxane                                                     | 12       |
| anthracycline with cyclophosphamide (and 5-fluorouracil) followed with taxane | 95       |
| taxane monotherapy                                                            | 2        |
| other (1× taxane with vinorelbine, 15× hormonal therapy)                      | 16       |

**B.** Adjuvant cytotoxic therapy ( $n = 300$ ).

| Drugs (regimen)                                                                                                                                                                                | <i>N</i> |
|------------------------------------------------------------------------------------------------------------------------------------------------------------------------------------------------|----------|
| anthracycline with cyclophosphamide (and 5-fluorouracil)                                                                                                                                       | 143      |
| anthracycline with taxane                                                                                                                                                                      | 3        |
| anthracycline with cyclophosphamide (and 5-fluorouracil) followed with taxane                                                                                                                  | 63       |
| taxane monotherapy                                                                                                                                                                             | 75       |
| Other <sup>2</sup> (10× CMF, 2× CMF followed with taxane, 1× GEMOX followed with taxane, 1× monotherapy with vinorelbine, 1× monotherapy with anthracycline, 1× monotherapy with capecitabine) | 16       |

**C.** Adjuvant hormonal therapy ( $n = 585$ )<sup>3</sup>.

| Drugs (regimen)                           | <i>N</i> |
|-------------------------------------------|----------|
| tamoxifen monotherapy                     | 299      |
| aromatase inhibitors monotherapy          | 181      |
| tamoxifen and aromatase inhibitors switch | 101      |
| other (3× monotherapy with Zoladex)       | 3        |

In 54 patients targeted therapy with herceptin was used in monotherapy ( $n = 22$ ) or in combination with cytotoxic or hormonal therapy ( $n = 32$ ). In 83 patients no hormonal or cytotoxic therapy was used in neoadjuvant or adjuvant setting. For 84 patients information about therapy was not available.

Footnotes: <sup>1</sup> adjuvant cytotoxic therapy was used in 88 patients pretreated with neoadjuvant therapy (all patients included in part B); <sup>2</sup> CMF = cyclophosphamide, methotrexate and 5-fluorouracil;

GEMOX = gemcitabine with oxaliplatin; <sup>3</sup>adjuvant hormonal therapy without cytotoxic agents was used in 312 patients (the distribution of treatment regimens was comparable to C).

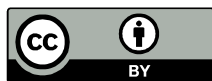

© 2018 by the authors. Licensee MDPI, Basel, Switzerland. This article is an open access article distributed under the terms and conditions of the Creative Commons Attribution (CC BY) license (<http://creativecommons.org/licenses/by/4.0/>).
